# Supplementary material for: Electrochemical impedance analysis of perovskite–electrolyte interfaces
Source: Royal Society of Chemistry journal article supplement (doi:10.1039/c6cc10315d), 2017-01-01
Supplement: c6cc10315d1.pdf [file c6cc10315d1.pdf]

## SUPPORTING INFORMATION

### Electrochemical Impedance Analysis of Perovskite-Electrolyte Interfaces

Zhen Li,<sup>a\*</sup> Candy C. Mercado,<sup>b\*</sup> Mengjin Yang,<sup>a</sup> Ethan Palay,<sup>a</sup> and Kai Zhu<sup>a</sup>

<sup>a</sup>. National Renewable Energy Laboratory, 15013 Denver West Parkway, Golden, CO 80401,

<sup>b</sup>. Renewable and Sustainable Energy Institute, and Department of Chemistry and Biochemistry, University of Colorado, Boulder, CO 80309-0027

#### Experimental

##### *Perovskite deposition*

Spin-coated MAPbI<sub>3</sub> (or SC-MAPbI<sub>3</sub>) films were prepared using a solvent-solvent extraction approach. Briefly, 62 wt % of methyl ammonium iodide (MAI) and PbI<sub>2</sub> (1.2:1 molar ratio) was dissolved in a mixed solvent of n-methyl-2-pyrrolidone (NMP) and gamma-butyrolactone (GBL) with weight ratio NMP/GBL=7/3. Pre-clean FTO substrate was spin-coated with 100  $\mu$ L precursor at 2000 rpm for 25 s, and transferred into vigorously stirred diethyl ether (DEE) bath for fast crystallization. Perovskite film was further annealed at 150 °C covered with a petri-dish for 15 min to remove the excess of MAI.

SC-MAPbBr<sub>3</sub> films were prepared using solvent engineering approach. 1 M of equal molar MABr and PbBr<sub>2</sub> was dissolved in a mixed solvent of dimethylformamide (DMF) and dimethyl sulfoxide (DMSO) with volume ratio DMF/DMSO=7:3. 100  $\mu$ L precursor was spin coated at 4000 rpm for 35 s, 1 mL of toluene was drop on the spinning substrate at 20 s to facilitate crystallization. For SC-FA<sub>0.85</sub>Cs<sub>0.15</sub>PbI<sub>3</sub> films, same procedure is used with a precursor containing 0.85 M FAI, 0.15 M CsI and 1M PbI<sub>2</sub>.

For sprayed (SP) films, 1:1:1 PbI<sub>2</sub>:MAI:MAcI, 1:1 MABr:PbBr, and 0.85:0.15:1 FAI:CsI:PbI<sub>2</sub> precursors were dissolved in 0.5 M in DMF for SP-MAPbI<sub>3</sub>, SP-MAPbBr<sub>3</sub>, and SP-FA<sub>0.85</sub>Cs<sub>0.15</sub>PbI<sub>3</sub> films, respectively. Sprayed films were deposited in ambient using a 60 kHz Sonotek ultrasonic spray nozzle with a 1 W atomizing power and N<sub>2</sub> as the carrier gas. A programmable syringe pump fed solution to the nozzle head with a 0.1 mL/min infusion rate. The stationary nozzle was fixed 5 cm above a rastering stage with a 30 mm/s path speed and 10 mm between passes. 30 coats were applied to glass/FTO substrates with a 10 minute anneal after each 10 coats. Substrates were held at 75, 75, and 170 °C during spray deposition and 100, 105, and 170 °C during the post anneal for MAPbI<sub>3</sub>, MAPbBr<sub>3</sub>, and FA<sub>0.85</sub>Cs<sub>0.15</sub>PbI<sub>3</sub> film deposition, respectively.

### *Electrochemical measurements*

The electrochemical measurements were taken using an electrochemical workstation (Potentiostat 283, Princeton Applied Research) with a three electrode configurations. Perovskite thin films deposited on FTO glass serve as working electrode (working area about 1 cm<sup>2</sup>). Pt wire was used as counter electrode and the reference electrode was a silver wire immersed in 0.01 M AgNO<sub>3</sub> in acetonitrile connected to the cell via a 0.1 M TBAPF<sub>6</sub> in CH<sub>2</sub>Cl<sub>2</sub> salt bridge. The three electrodes were immersed in an electrolyte composed of 0.1 M TBAPF<sub>6</sub> in CH<sub>2</sub>Cl<sub>2</sub> and sealed in a close glass chamber to avoid solvent lost and keep the working area constant. The measurements were taken under dark condition.

### *Liquid junction solar cell fabrication*

The cell assembly schematic is shown in figure S4. Perovskite thin films with thickness about 300 nm were deposited on FTO with 50 nm TiO<sub>2</sub> blocking layer. The compact TiO<sub>2</sub> blocking layer was deposited by spray pyrolysis at 450 °C using 0.2 M titanium diisopropoxide bis(acetylacetonate) 1-butanol solution, followed by 450 °C annealing for 1 h. Pt nanoparticle coated FTO glasses were used as counter electrodes. The perovskite and Pt electrodes were stacked together and separated by 300 μm Surlyn spacer using hot pressing. Redox electrolyte containing 0.1 mM Fc/Fc<sup>+</sup> and 0.1M TBAPF<sub>6</sub> in CH<sub>2</sub>Cl<sub>2</sub> was filled in the two electrode cell through pre-drilled holes on the Pt electrodes.

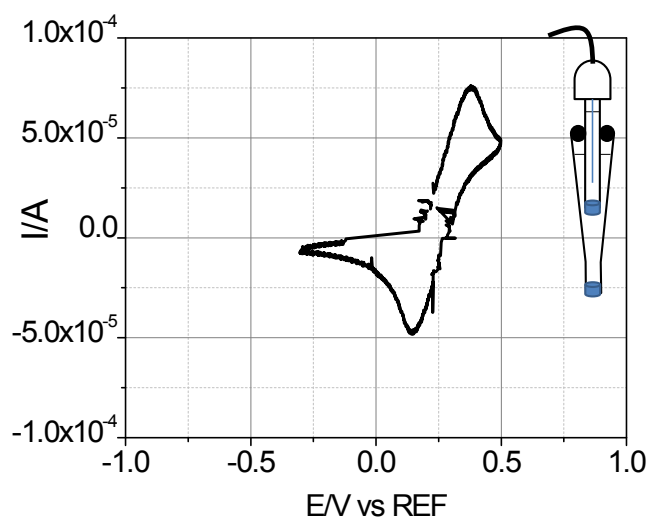

**Figure S1.** CV of  $\text{Fc}/\text{Fc}^+$  with the composite electrode (illustrated on the right),  $E_{1/2} = 0.25 \text{ V}$ .

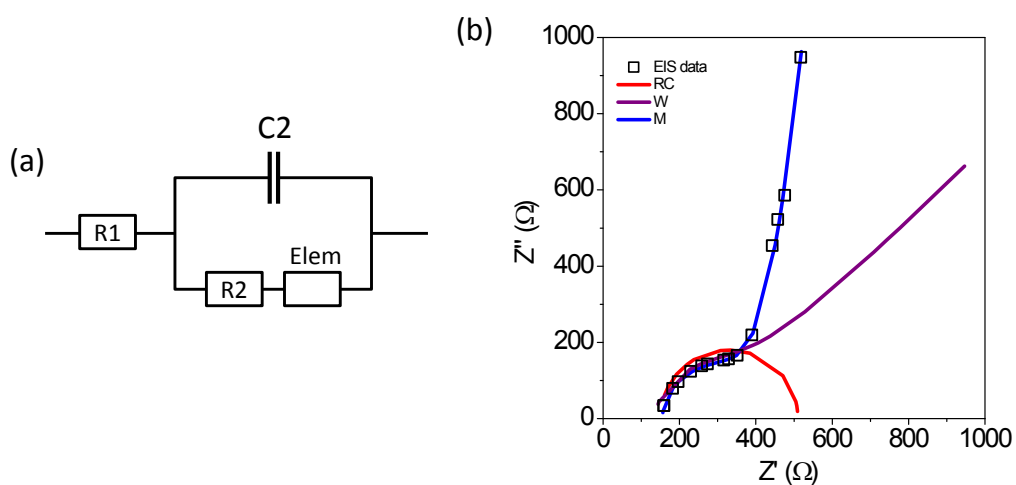

**Figure S2.** Equivalent circuits with different diffusion elements and fitting parameters for the SC-MAPbI<sub>3</sub> sample. RC denotes elem as just a connector; M denotes elem as an anomalous diffusion element; W denotes elem as a Warburg impedance.

**Table S1.** Fitting parameters of EIS plot of SC-MAPbI<sub>3</sub> in Figure S2 (above).

| Diffusion element | R1<br>Ω | C2<br>F | R2<br>Ω | Diffusion element parameters |         |         |     |
|-------------------|---------|---------|---------|------------------------------|---------|---------|-----|
|                   |         |         |         | s2<br>Ω s <sup>-1/2</sup>    | R3<br>Ω | t3<br>s | a3  |
| RC                | 150     | 8E-5    | 360     | -                            | -       | -       | -   |
| Warburg           | 150     | 3E-5    | 200     | 9090                         | -       | -       | -   |
| Anomalous         | 150     | 5E-5    | 240     |                              | 700     | 4E-3    | 0.6 |

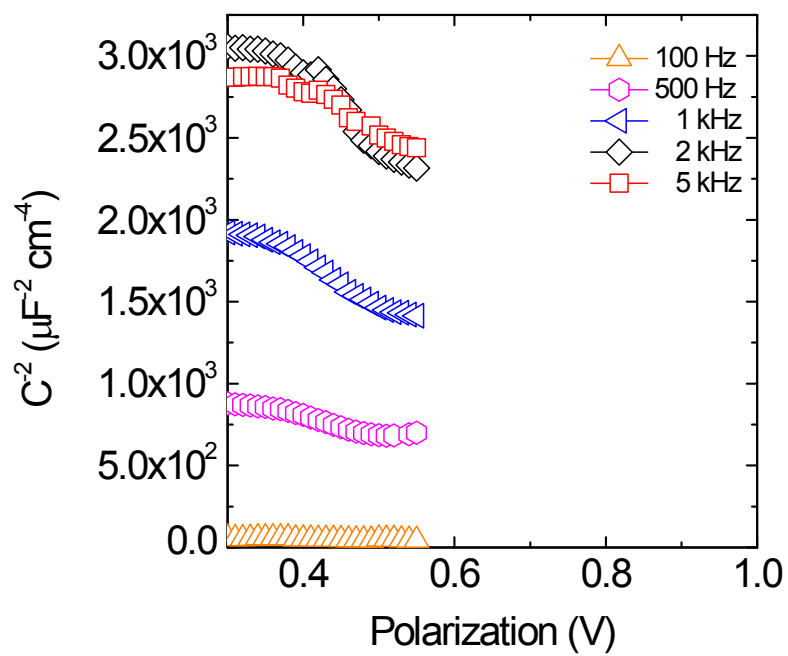

Figure S3. Dispersion of the MS plots for the spray-deposited SP-MAPbI<sub>3</sub> film.

| Compositions                                   | Spin-coated (SC)                                                                   | Spray-deposited (SP)                                                                |
|------------------------------------------------|------------------------------------------------------------------------------------|-------------------------------------------------------------------------------------|
| $\text{MAPbI}_3$                               | 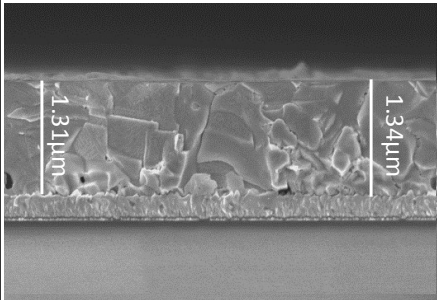  |   |
| $\text{FA}_{0.85}\text{Cs}_{0.15}\text{PbI}_3$ |   |   |
| $\text{MAPbBr}_3$                              |  |  |

**Figure S4.** Scanning electron microscopy images of cross section of perovskite films

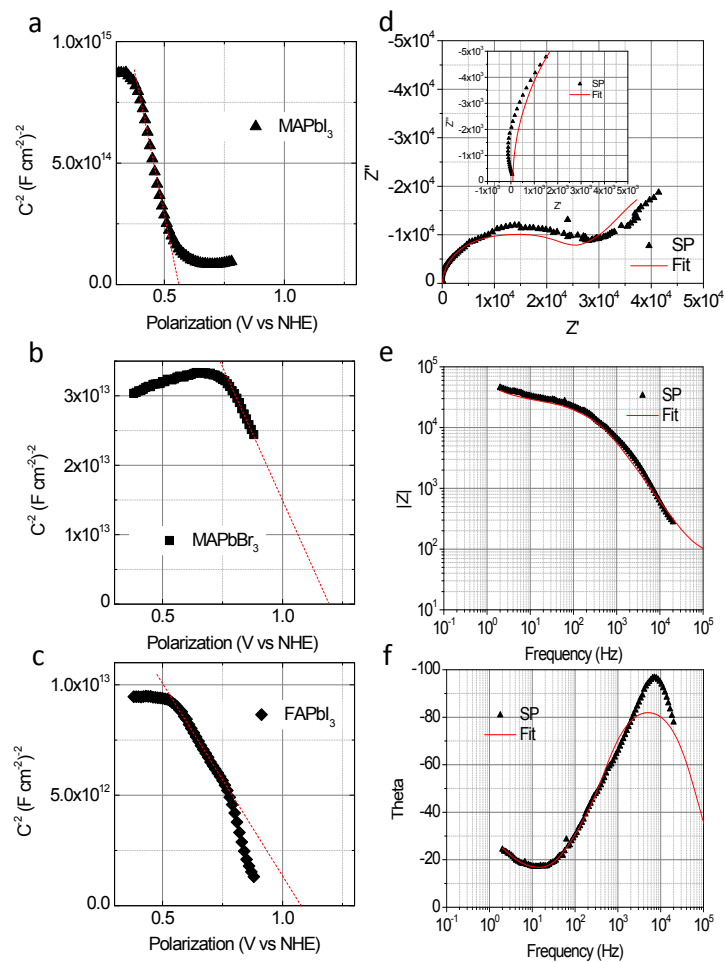

**Figure S5.** Characteristics of the spray deposited (SP) films, Mott-Schottky plots of (a) SP-MAPbI<sub>3</sub>, (b) MAPbBr<sub>3</sub>, and (c) FAPbI<sub>3</sub> at 1 kHz. EIS of SP-MAPbI<sub>3</sub> (d) Nyquist, (e) and (f) Bode plots.

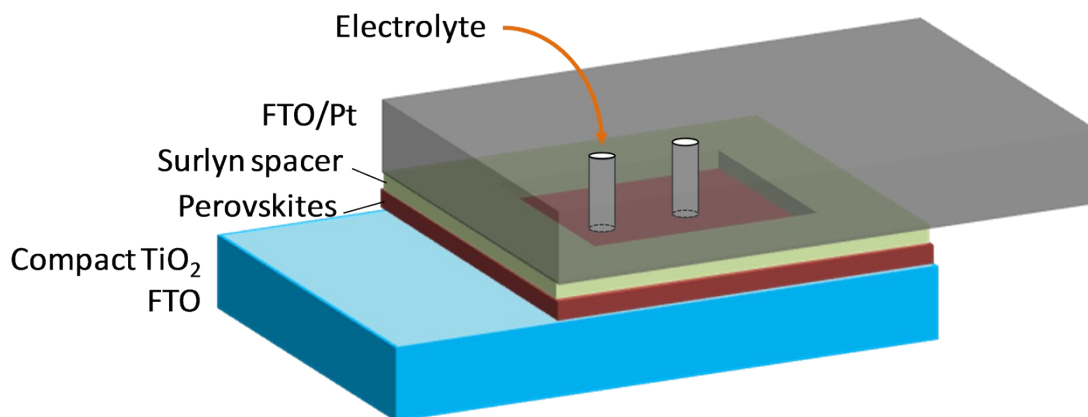

**Figure S6.** Schematics of assembly of perovskite liquid junction solar cells.

**Table S2.** Flat band potentials for various film compositions and deposition methods.

| Sample               |                                                        | $V_{FB}$<br>(V vs NHE) |
|----------------------|--------------------------------------------------------|------------------------|
| Spin coating<br>(SC) | MAPbI <sub>3</sub>                                     | 0.67                   |
|                      | FA <sub>0.85</sub> CS <sub>0.15</sub> PbI <sub>3</sub> | 0.96                   |
|                      | MAPbBr <sub>3</sub>                                    | 1.09                   |
| Spraying<br>(SP)     | MAPbI <sub>3</sub>                                     | 0.56                   |
|                      | FAPbI <sub>3</sub>                                     | 1.05                   |
|                      | MAPbBr <sub>3</sub>                                    | 1.21                   |



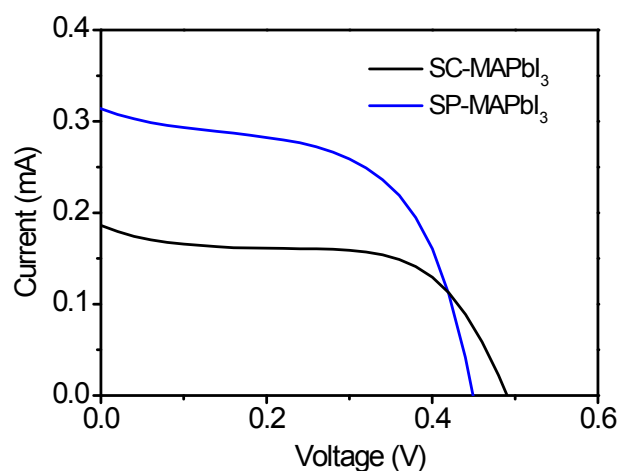

**Figure S7.** I-V curves of MAPbI<sub>3</sub> liquid junction solar cells with films prepared by different methods.

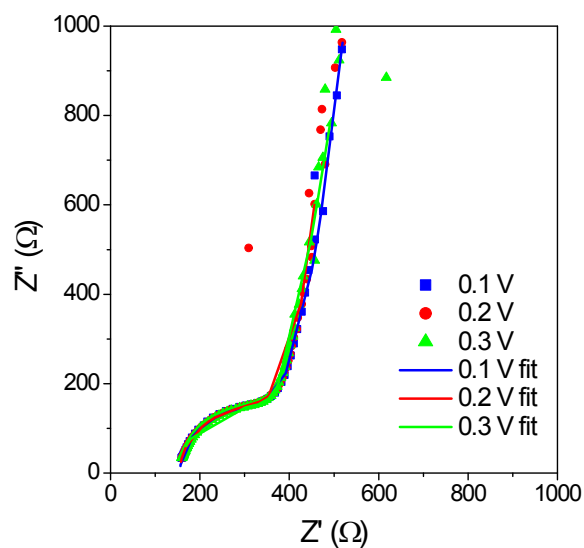

**Figure S8.** Nyquist plots of the SC-MAPbI<sub>3</sub> sample at various applied potential.

**Table S3.** Fitting parameters of the equivalent circuit to the Nyquist plots in figure S8 (above).

| Applied potential (V vs. ref) | R1<br>Ω | C2<br>F | R2<br>Ω | Anomalous diffusion element |         |     |
|-------------------------------|---------|---------|---------|-----------------------------|---------|-----|
|                               |         |         |         | R3<br>Ω                     | t3<br>s | a3  |
| 0.1                           | 150     | 5E-5    | 240     | 700                         | 4E-3    | 0.6 |
| 0.2                           | 150     | 5E-5    | 245     | 552                         | 3E-3    | 0.6 |
| 0.3                           | 150     | 5E-5    | 264     | 300                         | 2E-3    | 0.6 |

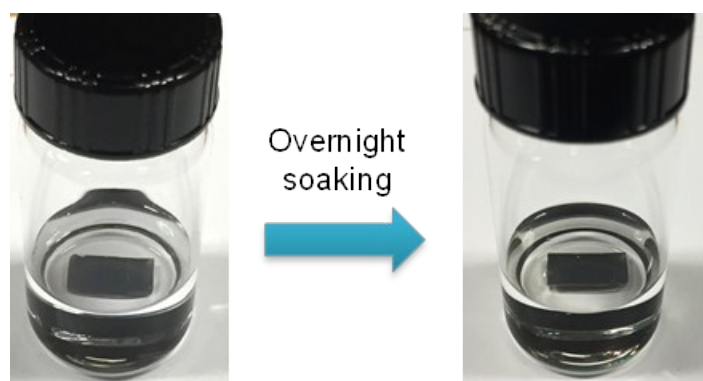

Figure S9. Photos of perovskite film soaked in DCM-based electrolyte.
